# Supplementary material
Source: publisher figshare collection journal article supplement (https://asha.figshare.com/articles/dataset/_/27105613)
Supplement: Supplementary file 1 [file 1]

## Supplemental Material S2. Microaggressions 2.0.

---

### Start of Block: Consent

By clicking "YES" you are indicating consent to participate in this study. Texas Christian University's Institutional Review Board has approved this study. All responses are completely anonymous; none of your responses can be identified to your name, school, or email. No questions are mandatory and you may stop completing the questionnaire at any time.

☐ Yes (1)

☐ No (2)

*Skip To: End of Survey If By clicking "YES" you are indicating consent to participate in this study. Texas Christian Univer... = No*

### End of Block: Consent

---

### Start of Block: Demographics

Q53 Please answer the following demographic questions, you may skip over anything that you do not feel comfortable answering. However, by providing more information, you can help us understand your experiences better (and help future CSD students!).

---

Q10 I am a/an

- ☐ undergraduate student (2)
  - ☐ post-baccalaureate student (3)
  - ☐ graduate student (master's) (4)
  - ☐ graduate student (doctoral degree) (9)
  - ☐ clinician with a master's degree in SLP or audiology (5)
  - ☐ clinician with a doctorate (SLPD, AuD, PhD) (6)
- 

Q33 I am studying to be or currently am a/an

- ☐ audiologist (1)
  - ☐ speech-language pathologist (2)
  - ☐ dually certified (3)
- 

Q32 I am \_\_\_\_\_ years old

- ☐ 18-24 (1)
  - ☐ 25-34 (2)
  - ☐ 35-44 (3)
  - ☐ 45 and over (4)
-

Q55 I graduated

- ☐ Within the last 5 years (1)
  - ☐ Within the last 10 years (2)
  - ☐ Within the last 15 years (3)
  - ☐ Over 20 years ago (4)
- 

Q24 I am

- ☐ Female (1)
  - ☐ Male (2)
  - ☐ Non-Binary (3)
  - ☐ Other: (4) \_\_\_\_\_
-

Q11 My race/ethnicity is (check all that apply; please use the boxes to be as specific as you would like)

- ☐ Asian: (1) \_\_\_\_\_
- ☐ Asian Indian: (2) \_\_\_\_\_
- ☐ Biracial/Multiracial: (3) \_\_\_\_\_
- ☐ African American: (4) \_\_\_\_\_
- ☐ Black: (5) \_\_\_\_\_
- ☐ Native American/Indigenous (12) \_\_\_\_\_
- ☐ Hispanic and/or Latino/a/x: (6) \_\_\_\_\_
- ☐ Arab: (7) \_\_\_\_\_
- ☐ Middle Eastern: (8) \_\_\_\_\_
- ☐ Native Hawaiian or Asian Pacific Islander: (9) \_\_\_\_\_
- ☐ White: (10) \_\_\_\_\_
- ☐ Other: (11) \_\_\_\_\_
-

Q25 I am

- ☐ Monolingual (1)
- ☐ Multilingual (2)

*Skip To: Q48 If I am = Monolingual*

---

Q26 In addition to English, what other language(s) do you speak?

- ☐ Spanish (1)
- ☐ French (2)
- ☐ Arabic (3)
- ☐ Hindi (4)
- ☐ Urdu (5)
- ☐ Russian (6)
- ☐ Hebrew (7)
- ☐ German (8)
- ☐ Chinese (9)
- ☐ Tagalog (10)
- ☐ Vietnamese (11)
- ☐ Other: (12) \_\_\_\_\_
-

Q39 Do you feel that your native language(s) is/are more proficient than your proficiency in English?

☐ Yes (which language(s)): (1)

---

☐ No (2)

---

Q41 Do you feel that your native language influences your expressive output in English in terms of: sound production, word choice, or grammar (i.e., First-language influenced English)?

☐ Yes (1)

☐ No (2)

---

Q48 I speak Mainstream or General American English as my *primary* dialect.

☐ Yes (1)

☐ No (2)

---

Q40 What dialects do you speak (check all that apply)?

- ☐ Mainstream American English/General American English (1)
  - ☐ Appalachian English (2)
  - ☐ African American English (3)
  - ☐ Northwest American English (4)
  - ☐ Southwest American English (5)
  - ☐ Central Midland American English (6)
  - ☐ Southern American English (7)
  - ☐ Middle Atlantic American English (8)
  - ☐ Eastern New England American English (9)
  - ☐ Western Pennsylvania American English (10)
  - ☐ New York City American English (11)
  - ☐ North Central American English (12)
  - ☐ Spanish-Influenced English (13)
  - ☐ Chinese-Influenced English (14)
  - ☐ Other (15) \_\_\_\_\_
-

Q27 I was born in the United States

- ☐ Yes (1)
- ☐ No (2)
- 

Q28 If you were not born in the United States, how long have you been in the United States?

- ☐ 0-2 years (1)
- ☐ 3-4 years (2)
- ☐ 5 or more years (3)
- 

Q29 If you were not born in the United States, please choose one of the following

- ☐ I was not born in the United States, but I was raised here. (1)
- ☐ I was not born in the United States, but I am here for school. (2)
- 

Q30 I am

- ☐ The first in my family to attend college (1)
- ☐ The first in my family to attend college in the United States (2)
- ☐ Not the first in my family to attend college (3)
-



Q31 I identify with the following groups (check all that apply)

- ☐ non-traditional/professional student (1)
  - ☐ international student (2)
  - ☐ multilingual speaker (3)
  - ☐ non-majority dialect speaker (social and regional) (4)
  - ☐ individual who is gender diverse (5)
  - ☐ individual who is transgender (6)
  - ☐ first generation college student (7)
  - ☐ individual with a disability (8)
  - ☐ a racial or ethnic minority (9)
  - ☐ male (10)
  - ☐ individual from a religious minority background (11)
  - ☐ None of the above (please add anything else you would like to share) (12)
- 

End of Block: Demographics

---

Start of Block: Microaggressions

*Q13 A microaggression is defined as experiencing a statement, action, or incident regarded as instance of indirect, subtle, or unintentional discrimination against a member or members of a marginalized group.*

During my communication sciences and disorder program, I experienced microaggressions based on my cultural/linguistic identity.

☐ Yes (1)

☐ No (2)

-----

Q14 I have been treated and/or felt "othered" within my CSD program and/or clinical practicum. Othered is defined as being treated and/or made to feel different from a group and or society.

For example, a student who experiences otherness may experience physical otherness (e.g., being left out of study groups) or social otherness (e.g., making comments that make someone feel that they do not belong to a group based on their identity and/or behaviors).

☐ Yes (1)

☐ No (2)

Skip To: Q16 If I have been treated and/or felt "othered" within my CSD program and/or clinical practicum. Other... = No

-----

Q15 Please describe your experience feeling and/or being "othered" in your CSD program and/or clinical practicum.

---

---

---

---

---

Q16 I have experienced damaging generalizations within my CSD program and/or clinical practicum. Generalizations are broad statements or ideas that are applied to a person or group.

For example, damaging generalizations that have been reported in previous research in CSD include generalizations such as, "all Asians are good at math" or "women from Arab backgrounds have limited education choices."

☐ Yes (1)

☐ No (2)

*Skip To: Q18 If I have experienced damaging generalizations within my CSD program and/or clinical practicum. Gene... = No*

Q17 Please describe the generalizations you experienced in your CSD program and/or practicum.

---

---

---

---

---

Q18 I have experienced maltreatment from faculty and or clinical supervisors. Maltreatment is defined as indirect or direct statements or actions that negatively impacted your socio-emotional well-being and/or your academic success.

For example, previous research in CSD has indicated that maltreatment from faculty included statements such as, "You cannot be in CSD if you have a learning disability" or a clinical supervisor may make comments about your perceived lack of professionalism due to your dialect or appearance.

☐ Yes (1)

☐ No (2)

*Skip To: Q20 If I have experienced maltreatment from faculty and or clinical supervisors. Maltreatment is defined... = No*

Q19 Please describe the maltreatment experienced from faculty and/or clinical supervisors during your CSD program and/or clinical practicum.

---

---

---

---

---

Q20 I have experienced maltreatment from peers. Maltreatment is defined as indirect or direct statements or actions that negatively impacted your socio-emotional well-being and/or your academic success.

For example, previous research in CSD has indicated that classmates may say, "you'll get into grad school because you are a \_\_\_\_\_(a specific cultural identity)" or classmates may not respect your input during group assignments.

☐ Yes (1)

☐ No (2)

*Skip To: Q22 If I have experienced maltreatment from peers. Maltreatment is defined as indirect or direct statements... = No*

Q21 Please describe the maltreatment experienced from peers during your CSD program and/or clinical practicum.

---

---

---

---

---

Q42 I have experienced linguistic discrimination in my CSD program.

For example, previous research in CSD has indicated that students who are speakers of Non-Mainstream/General dialects may be instructed to speak in Mainstream or General American English or hear negative comments about the dialect that they speak.

☐ Yes (1)

☐ No (2)

*Skip To: Q35 If I have experienced linguistic discrimination in my CSD program. For example, previous research i... = No*

Q43 Please describe the linguistic discrimination you experienced in your CSD program.

---

---

---

---

---

---

Q35 I have experienced bystander effect. Bystander effect is when an individual does not react in support of an individual who is receiving maltreatment through behaviors, actions, or words. For example, previous research in CSD has reported bystander effect when a clinical supervisor hears a client speak negatively about a student-clinician's personal background, but does not do anything to address it.

Please check all that apply

- ☐ Yes, from a classmate (1)
- ☐ Yes, from a teacher (2)
- ☐ Yes, from a clinical supervisor (3)
- ☐ No, I have not experienced bystander effect. (4)
- ☐ Other (5) \_\_\_\_\_
- 

Q52 Please describe the bystander effect you experienced

---

---

---

---

---

Q22 Did you experience any challenges or barriers and/or discrimination that were not listed above in your graduate program and/or practicum?

☐ Yes (1)

☐ No (2)

*Skip To: End of Block If Did you experience any challenges or barriers and/or discrimination that were not listed above in... = No*

Q23 Please describe those challenges or barriers:

---

---

---

---

---

End of Block: Microaggressions

Start of Block: Outcomes

Q24 Did the microaggression(s) you experienced negatively impact your socio-emotional well-being?

☐ Yes (1)

☐ No (2)

☐ I did not experience any microaggressions (3)

*Skip To: Q45 If Did the microaggression(s) you experienced negatively impact your socio-emotional well-being? = I did not experience any microaggressions*

Q49 Please describe how the microaggression(s) you experienced negatively impacted your socio-emotional well-being:

---

---

---

---

---

Q25 Did the microaggression you experienced negatively impact your academics?

- ☐ Yes (1)
- ☐ No (2)

Q50 Please describe how the microaggression(s) you experienced negatively impacted your academics:

- ☐ Extremely negative (1)
- ☐ Somewhat negative (2)
- ☐ Neither positive nor negative (3)
- ☐ Somewhat positive (4)
- ☐ Extremely positive (5)



Q26 Did the microaggression make you consider changing majors?

☐ Yes (1)

☐ No (2)

---

Q27 Did you report the microaggression(s) you experienced?

☐ Yes (1)

☐ No (2)

*Skip To: Q29 If Did you report the microaggression(s) you experienced? = No*

---

Q44 Check all the microaggressions that you reported:

☐

Othering (1)

☐

Damaging generalizations (2)

☐

Maltreatment from faculty and/or clinical supervisors (3)

☐

Maltreatment from peers (4)

☐

Linguistic discrimination (5)

---

Q34 If yes, to whom (check all that apply)?

- ☐ My teacher (1)
  - ☐ Department Chair (2)
  - ☐ Academic Advisor (3)
  - ☐ Student Services (4)
  - ☐ Other (5) \_\_\_\_\_
- 

Q28 If yes, what was the outcome?

- ☐ It was addressed and positive change was made. Optional- please explain: (1)  
\_\_\_\_\_
  - ☐ It was addressed, but no positive change was made. Optional- please explain: (2)  
\_\_\_\_\_
  - ☐ It was not addressed. Optional- please explain: (3)  
\_\_\_\_\_
  - ☐ Other (4) \_\_\_\_\_
-

Q29 If no, please choose from the following (choose all that apply)

☐ I did not feel safe reporting the microaggression due to the departmental/clinical environment (1)

☐ I was worried about my grade and/or passing my practicum (2)

☐ I was worried about alienation from my peers (3)

☐ I did not know I could report a microaggression (4)

☐ I did not feel that any meaningful change would come from it (5)

☐ Other: (6) \_\_\_\_\_

---

Q45 Is there anything else about your cultural and linguistic identity that influences/ has influenced your academic experience in CSD? If yes, please describe below:

---

---

---

---

---

**End of Block: Outcomes**

---

**Start of Block: Interview**

Q30 A second part of this research consists of an optional interview. If you want to participate you will be asked to provide your email address in a separate link by clicking "yes." We will schedule a time to talk to you by phone or Zoom. The interview (semi-structured) will consist of open-ended questions that will cover your perspectives related to personal experience as a student in Communication Disorders and your personal identities. Questions will be in three main topic areas: background information, experiences at college, and future expectations. Participants will be interviewed for approximately 60 minutes. The

interviews will be audio recorded using a digital voice recorder for later analysis

If you do not want to participate in an interview, please click "no," and you will be sent to the end of the survey.

☐ Yes (1)

☐ No (2)

*Skip To: End of Block If A second part of this research consists of an optional interview. If you want to participate you... = Yes*

**End of Block: Interview**

---
